# Supplementary material for: Neonatal and perinatal mortality in the urban continuum: a geospatial analysis of the household survey, satellite imagery and travel time data in Tanzania
Source: PubMed Central journal article supplement — BMJ Glob Health. 2023 Apr 7;8(4):e011253. doi: 10.1136/bmjgh-2022-011253 (PMC10083757; doi:10.1136/bmjgh-2022-011253), 2023-04-07
Supplement: bmjgh-2022-011253supp002.pdf [file bmjgh-2022-011253supp002.pdf]

## Supplementary file 2

## Summary of variables used in analysis

| LEVEL                                                                                                         |                                                                                                                                                                                                                                               | Availability                                                   |                |
|---------------------------------------------------------------------------------------------------------------|-----------------------------------------------------------------------------------------------------------------------------------------------------------------------------------------------------------------------------------------------|----------------------------------------------------------------|----------------|
| Dimension and variable                                                                                        | Response options                                                                                                                                                                                                                              | Live births                                                    | Stillbirths    |
| <b>GEOGRAPHIC ZONE</b>                                                                                        |                                                                                                                                                                                                                                               |                                                                |                |
| Geographic zone (aggregation of regions into 8 zones, same as by DHS)                                         | Western; Lake; Northern; Central; Southwest highlands; Southern Highlands; Southern; and Eastern                                                                                                                                              | Yes                                                            | Yes            |
| <b>HOUSEHOLD CHARACTERISTICS</b>                                                                              |                                                                                                                                                                                                                                               |                                                                |                |
| Household wealth quintile (provided by DHS in the dataset)                                                    | Poorest; Poorer; Middle; Richer; Richest                                                                                                                                                                                                      | Yes                                                            | Yes            |
| Household size (mean number of members)                                                                       | continuous                                                                                                                                                                                                                                    | Yes                                                            | Yes            |
| <b>SOCIO-ECONOMIC CHARACTERISTICS OF THE WOMAN</b>                                                            |                                                                                                                                                                                                                                               |                                                                |                |
| Maternal education and literacy                                                                               | No education; Primary education/illiterate; Primary education/literate; Secondary or higher                                                                                                                                                   | Yes                                                            | Yes            |
| Marital status at survey                                                                                      | Married or cohabiting; Not married/cohabiting                                                                                                                                                                                                 | Yes                                                            | Yes            |
| Maternal age group at time of birth (in years)                                                                | <20; 20-29; 30-49                                                                                                                                                                                                                             | Yes                                                            | Yes            |
| Maternal decision-making about health - person who decides about woman's health care                          | Self (alone or in combination with others); Not the respondent at all (others)                                                                                                                                                                | Yes                                                            | Yes            |
| Maternal relocation (fewer than 5 years lived in current residence at time of survey)                         | Yes; No                                                                                                                                                                                                                                       | Yes                                                            | Yes            |
| Maternal anaemia at survey (adjusted for altitude, smoking and current pregnancy)                             | Yes; No                                                                                                                                                                                                                                       | Yes                                                            | Yes            |
| Maternal mobile phone ownership                                                                               | Yes; No                                                                                                                                                                                                                                       | Yes                                                            | Yes            |
| Ownership of health insurance                                                                                 | Yes; No                                                                                                                                                                                                                                       | Yes                                                            | Yes            |
| <b>PREGNANCY AND HEALTH-SEEKING BEHAVIOUR</b>                                                                 |                                                                                                                                                                                                                                               |                                                                |                |
| Mode of childbirth                                                                                            | Vaginal; Caesarean                                                                                                                                                                                                                            | Yes                                                            | No             |
| Multiple birth (twins or higher order multiples)                                                              | Yes; No                                                                                                                                                                                                                                       | Yes                                                            | No             |
| Birth order and preceding birth interval (months)                                                             | First child; 2nd or 3rd child with <24 months birth interval; 2nd or 3rd child with 24+ months birth interval; 4th or higher birth order child with <24 months birth interval; 4th or higher birth order child with 24+ months birth interval | Yes                                                            | No             |
| Sex of child                                                                                                  | Male; Female                                                                                                                                                                                                                                  | Yes                                                            | No             |
| Pregnancy wanted at the time of conception                                                                    | Yes; No                                                                                                                                                                                                                                       | Yes                                                            | No             |
| Place of birth                                                                                                | Home; Lower level facility; Hospital                                                                                                                                                                                                          | Yes                                                            | No             |
| Antenatal care during pregnancy                                                                               | No ANC; 1-3 visits; 4 or more visits                                                                                                                                                                                                          | Most recent only                                               | No             |
| Child weighed at birth                                                                                        | Yes; No                                                                                                                                                                                                                                       | Most recent only                                               | No             |
| Child's birthweight category among babies who were weighed (in grams)                                         | Low (<2500g); Normal (2500g-4000g); Macrosomia (>4000g)                                                                                                                                                                                       | Most recent only (if weighed)                                  | No             |
| <b>OUTCOME</b>                                                                                                |                                                                                                                                                                                                                                               |                                                                |                |
| Neonatal death (<30 days of live birth)                                                                       | Yes; No                                                                                                                                                                                                                                       | Yes                                                            | not applicable |
| Among neonatal deaths: Age of child at death in days                                                          | Continuous: 1 (day of birth) – 30                                                                                                                                                                                                             | Yes (if neonatal death)                                        | not applicable |
| Among neonatal deaths: Category of time of death                                                              | Day of birth; Day 2-7 (early); Day 8-30 (late)                                                                                                                                                                                                | Yes (if neonatal death)                                        | not applicable |
| Among neonatal deaths if birth in health facility: Timing of neonatal death in relation to mother's discharge | Before mother discharged; After mother discharged                                                                                                                                                                                             | Yes (if facility delivery, most recent child & neonatal death) | not applicable |
| Stillbirth (death before birth after 7+ months of pregnancy)                                                  | Yes; No                                                                                                                                                                                                                                       | not applicable                                                 | Yes            |
| Perinatal death (death after 7+ months of pregnancy up to 7 days after birth)                                 | Yes; No                                                                                                                                                                                                                                       | Yes                                                            | Yes            |
| <b>EXPOSURE</b>                                                                                               |                                                                                                                                                                                                                                               |                                                                |                |
| Residence according to DHS                                                                                    | Rural; Urban                                                                                                                                                                                                                                  | Yes                                                            | Yes            |
| GHS-SMOD exposure                                                                                             | Core urban; Semi-urban; Rural                                                                                                                                                                                                                 | Yes                                                            | Yes            |
| Mean travel time from cluster to nearest hospital                                                             | continuous in minutes, continuous in hours                                                                                                                                                                                                    | Yes                                                            | Yes            |
| Category of travel time to nearest hospital                                                                   | <2 hours; 2 hours or more                                                                                                                                                                                                                     | Yes                                                            | Yes            |
