# Supplementary material for: Neonatal and perinatal mortality in the urban continuum: a geospatial analysis of the household survey, satellite imagery and travel time data in Tanzania
Source: PubMed Central journal article supplement — BMJ Glob Health. 2023 Apr 7;8(4):e011253. doi: 10.1136/bmjgh-2022-011253 (PMC10083757; doi:10.1136/bmjgh-2022-011253), 2023-04-07
Supplement: bmjgh-2022-011253supp003.pdf [file bmjgh-2022-011253supp003.pdf]

**Supplementary file 3.****Distribution neonatal deaths by age at death and facility discharge, by urbanicity category**

| Neonatal deaths - distribution of age at death by urbanicity category (n=217) |                             |            |            |            |         |
|-------------------------------------------------------------------------------|-----------------------------|------------|------------|------------|---------|
|                                                                               | Overall (Tanzania mainland) | Core urban | Semi-urban | Rural      | p-value |
| Category of age in days at death (column %)                                   |                             |            |            |            |         |
| Day of birth                                                                  | 37.4%                       | 26.9%      | 33.8%      | 45.3%      | 0.128   |
| Days 2-7                                                                      | 48.3%                       | 68.3%      | 46.8%      | 40.9%      |         |
| Days 8-30                                                                     | 14.3%                       | 4.8%       | 19.4%      | 13.8%      |         |
| Number of days at death (mean and SE)                                         | 4.1 (0.38)                  | 2.9 (0.39) | 5.1 (0.70) | 3.6 (0.58) |         |

| Time of neonatal death (before of after discharge) among most recent live births in health facilities by urbanicity category |                             |            |            |       |         |
|------------------------------------------------------------------------------------------------------------------------------|-----------------------------|------------|------------|-------|---------|
|                                                                                                                              | Overall (Tanzania mainland) | Core urban | Semi-urban | Rural | p-value |
| Time of neonatal death                                                                                                       |                             |            |            |       |         |
| Before discharge                                                                                                             | 44.9%                       | 60.3%      | 27.2%      | 58.2% | 0.045   |
| After discharge                                                                                                              | 55.1%                       | 39.7%      | 72.8%      | 41.8% |         |

**Stillbirths: Early neonatal death ratio**

| Overall (Tanzania mainland) | Core urban | Semi-urban | Rural |
|-----------------------------|------------|------------|-------|
| 0.85                        | 0.52       | 0.93       | 0.94  |
